# Supplementary material for: Integrated proteogenomic characterization across major histological types of pituitary neuroendocrine tumors
Source: PubMed Central journal article supplement (PMC9715725; doi:10.1038/s41422-022-00736-5), 2022-10-28
Supplement: 41422_2022_736_MOESM1_ESM.pdf [file 41422_2022_736_MOESM1_ESM.pdf]

**a**

| TF lineage | Tumor name          | Abbreviation | Hormone                                                             | Gene           |
|------------|---------------------|--------------|---------------------------------------------------------------------|----------------|
| PIT1       | Lactotroph tumor    | PRL          | Prolactin (PRL)                                                     | PRL            |
|            | Somatotroph tumor   | GH           | Growth hormone (GH)                                                 | GH1            |
|            | Thyrotroph tumor    | TSH          | Thyroid stimulating hormone (TSH)                                   | TSHB, CGA      |
|            | Silent PIT1 tumor   | Silent PIT1  | Non-functioning                                                     | -              |
| TPIT       | Corticotroph tumor  | ACTH         | Adrenocorticotrophic Hormone (ACTH)                                 | POMC           |
|            | Silent TPIT tumor   | Silent TPIT  | Non-functioning                                                     | -              |
| SF1        | Gonadotroph tumor   | GN           | Follicle Stimulating Hormone (FSH), and/or Luteinizing Hormone (LH) | FSHB, LHB, CGA |
|            | Silent SF1 tumor    | Silent SF1   | Non-functioning                                                     | -              |
| Null       | Null-cell tumor     | Null         | Non-functioning                                                     | -              |
| Pluri      | Plurihormonal tumor | Pluri        | Multiple hormones                                                   | -              |

**b**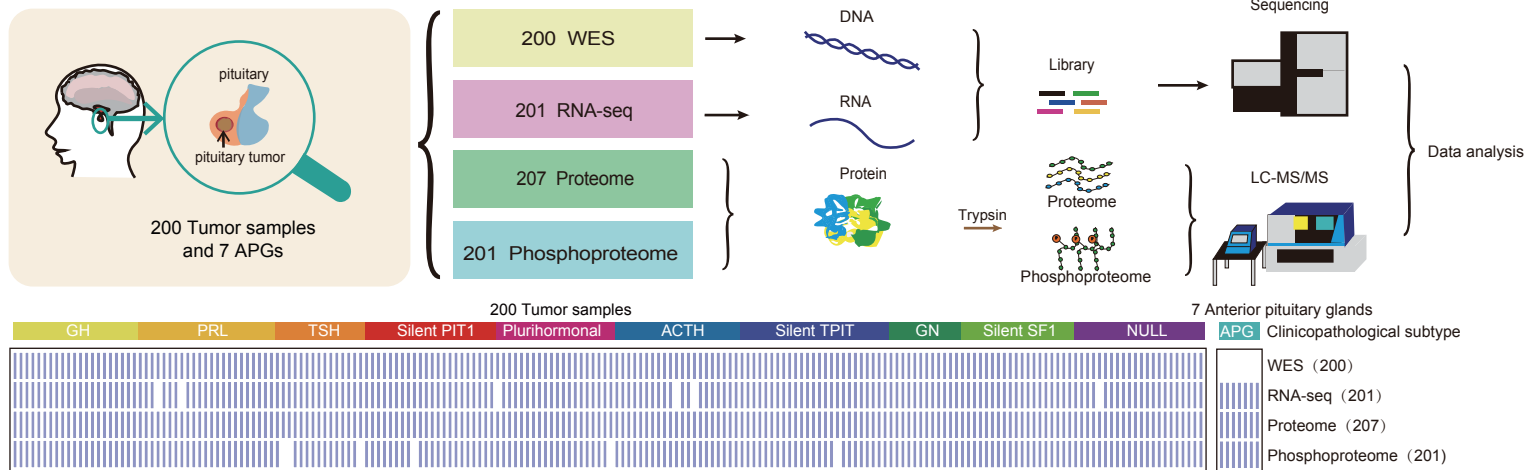**c**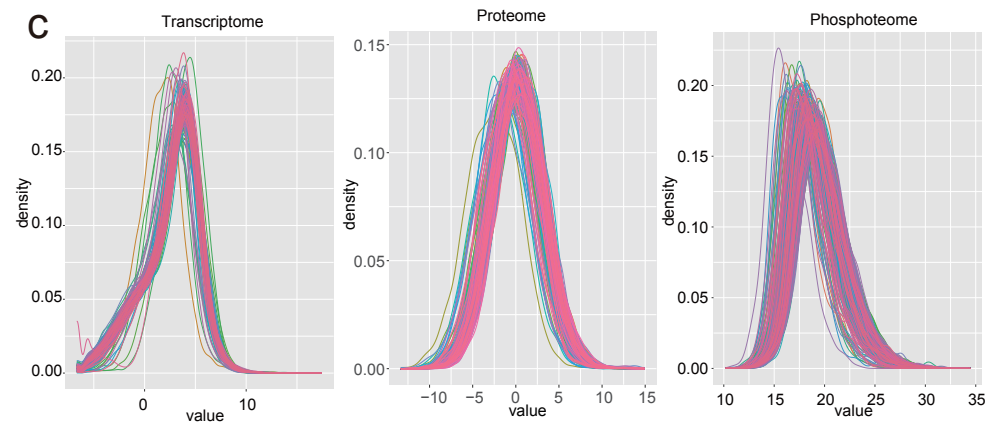**d** Spearman's correlation coefficients of HEK293T control experiments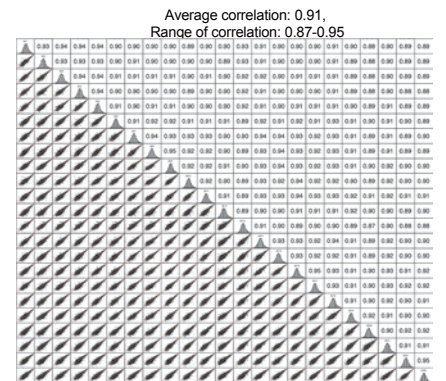**e**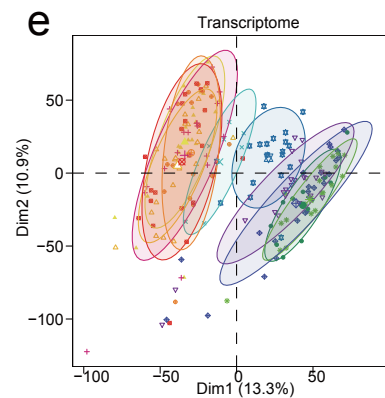**f**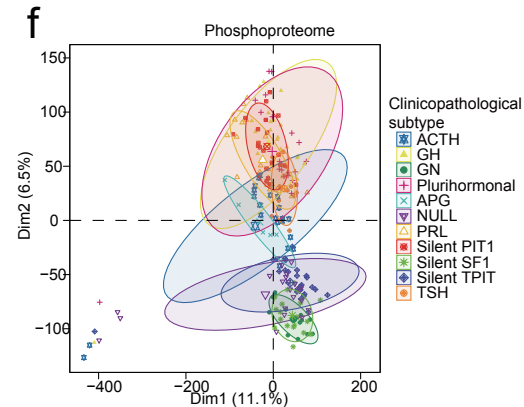**g**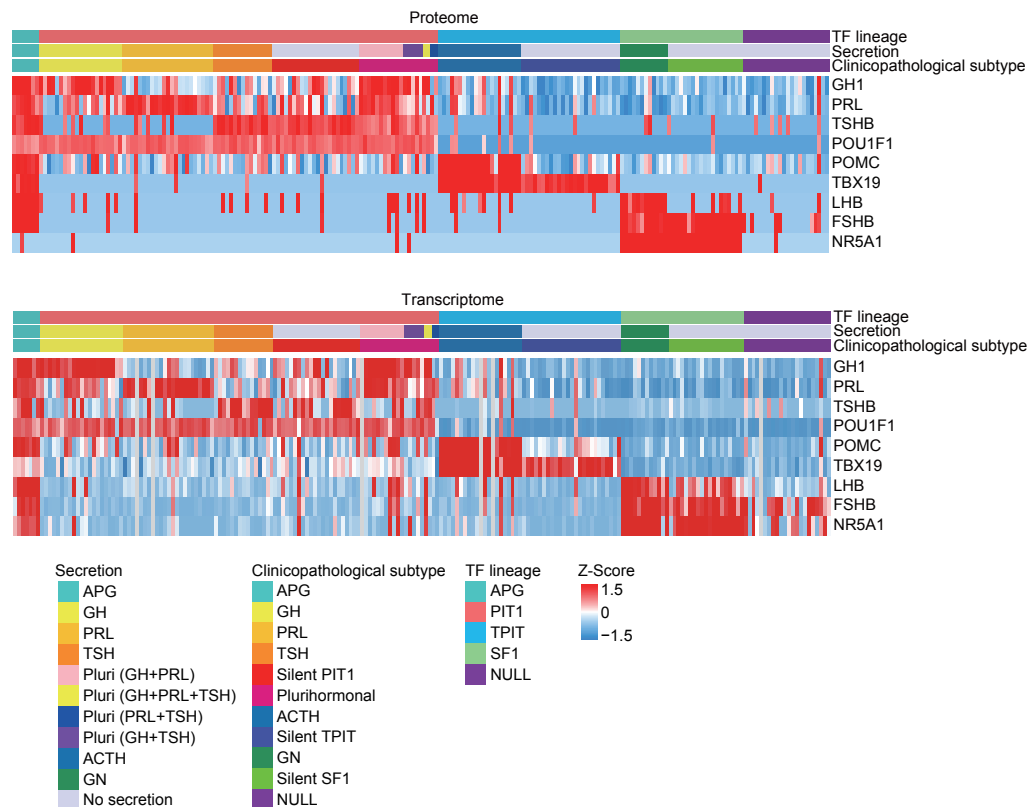

**Supplementary information, Fig. S1 Proteogenomic landscape of PitNETs, related to Fig. 1.**

**a** The clinicopathological classification (2017 WHO) of PitNETs.

**b** Schematic of the proteogenomic analyses of PitNETs (top). To facilitate homogeneity of samples, 200 fresh frozen tumors and donated 7 APGs were cryopulverized and aliquoted for genomic, transcriptomic, proteomic, and phosphoproteomic analyses (bottom).

**c** Distribution of mRNA, protein, phosphosite abundances in tumors by a density plot. A unimodal distribution (dip test) was observed. All of samples passed quality control.

**d** Longitudinal quality control of mass spectrometry using a tryptic digest of HEK293T cells. The top right panel presents the pairwise Spearman's correlation coefficients of the samples, and the bottom left panel depicts the pairwise comparison of 23 samples by scatterplots. An average correlation coefficient of 0.91 was observed.

**e, f** Principal component analysis of the transcriptomic and phosphoproteomic datasets based on clinicopathological subtype.

**g** Heatmaps showing the expression of known PitNET markers based on transcriptomics and proteomics data in each clinicopathological subtype.
