# Supplementary material for: Integrated proteogenomic characterization across major histological types of pituitary neuroendocrine tumors
Source: PubMed Central journal article supplement (PMC9715725; doi:10.1038/s41422-022-00736-5), 2022-10-28
Supplement: 41422_2022_736_MOESM2_ESM.pdf [file 41422_2022_736_MOESM2_ESM.pdf]

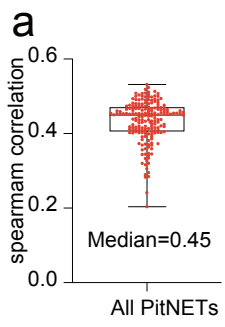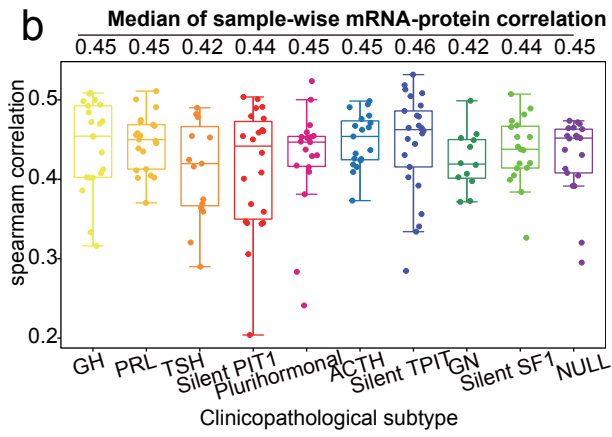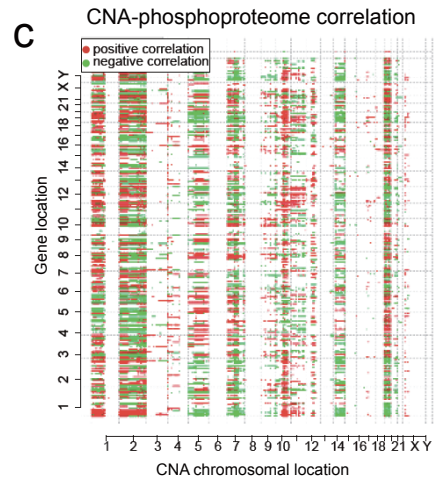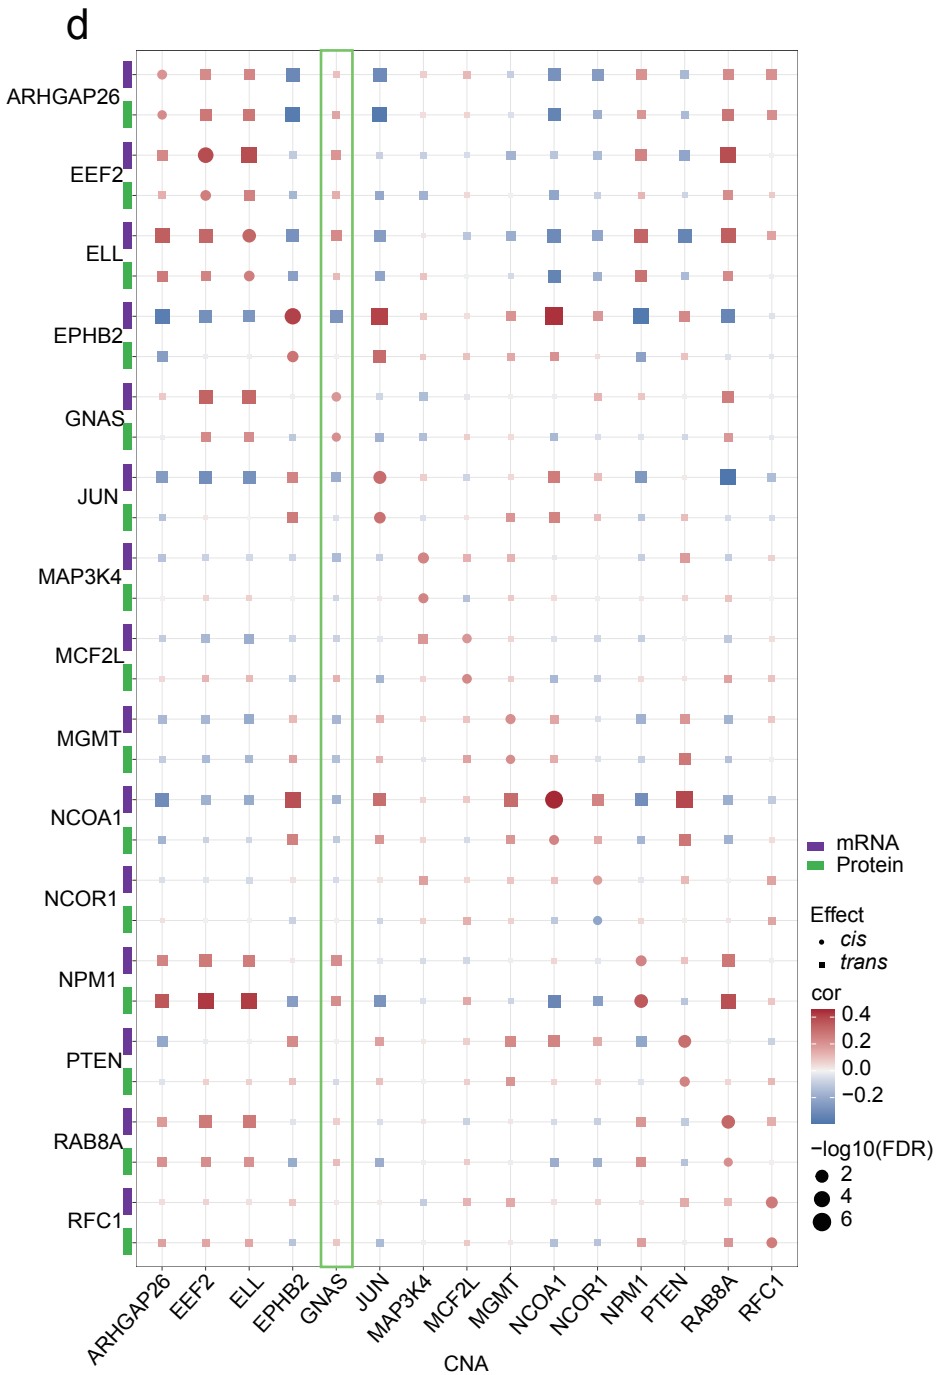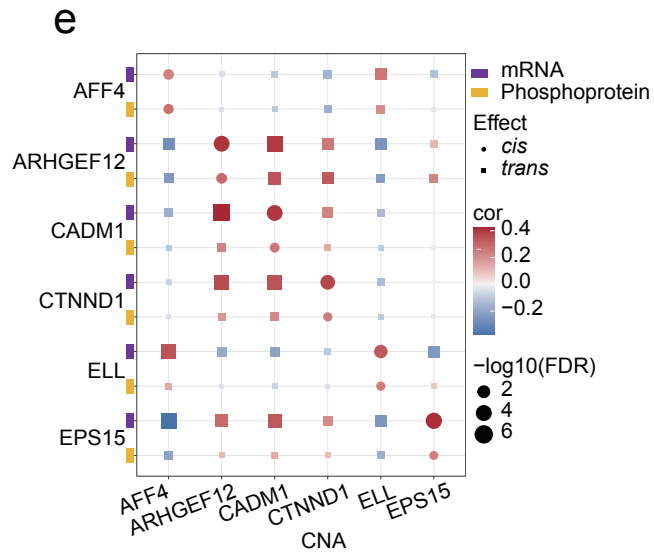

**Supplementary information, Fig. S2 Impact of CNAs on the transcriptome, proteome and phosphoproteome of PitNETs, related to Fig. 2.**

**a** Boxplot showing sample-wise mRNA-protein correlations in all PitNETs.

**b** Median of sample-wise mRNA-protein correlations in each clinicopathological subtype.

**c** The panel shows the correlation of CNAs to phosphoprotein abundance, with significant positive correlations in red and negative correlations in green (Spearman's correlation, FDR < 0.05). Genes were sorted by chromosomal location on the x and y axes.

**d** Significant *cis* and *trans* effects of selected 15 CAGs on the expression of cancer associated mRNA and protein.

**e** Significant *cis* and *trans* effects of selected 6 CAGs on the expression of cancer associated mRNA and phosphoprotein.
