# Supplementary material for: Integrated proteogenomic characterization across major histological types of pituitary neuroendocrine tumors
Source: PubMed Central journal article supplement (PMC9715725; doi:10.1038/s41422-022-00736-5), 2022-10-28
Supplement: 41422_2022_736_MOESM4_ESM.pdf [file 41422_2022_736_MOESM4_ESM.pdf]

**Supplementary information, Fig. S4 Consensus clustering for proteomic, transcriptomic and phosphoproteomic data, related to Fig. 4.**

**a-c** Subgroups are identified based on proteomic (n = 200), transcriptomic (n = 194) and phosphoproteomic (n = 194) data by K-means consensus clustering upon their abundance. Consensus matrices, consensus cumulative distribution function (CDF) plot, delta area (change in CDF area) plot and silhouette plots are shown.

**d, e** The overlap of each proteomic cluster in clinicopathological subtypes (d) and TF lineages (e), respectively.

**f** Boxplots depicting the distribution of multi-gene proliferation scores (MGPS) inferred by ESTIMATE among tumors of the seven proteomic clusters. Wilcoxon rank-sum test was used to estimate the significance of two clusters ( $*P < 0.05$ ,  $**P < 0.01$ ,  $***P < 0.001$ ). Kruskal-Wallis test was used to test if any of the differences among the subgroups were statistically significant.

**g** The representative graphs of HE staining and machine learning (ML) classification in one GH<sup>enrich</sup> and one EMT<sup>PRO</sup>, respectively. Scale bar is 100  $\mu\text{m}$ .

**h** Boxplot depicting the co-staining of panCK-positive and FN1-positive fluorescence areas among the seven proteomic clusters.

**i** IHC staining of representative pathology micrographs for ZEB2 and TWIST1. Scale bar is 50  $\mu\text{m}$ .
