# Supplementary material for: Integrated proteogenomic characterization across major histological types of pituitary neuroendocrine tumors
Source: PubMed Central journal article supplement (PMC9715725; doi:10.1038/s41422-022-00736-5), 2022-10-28
Supplement: 41422_2022_736_MOESM6_ESM.pdf [file 41422_2022_736_MOESM6_ESM.pdf]

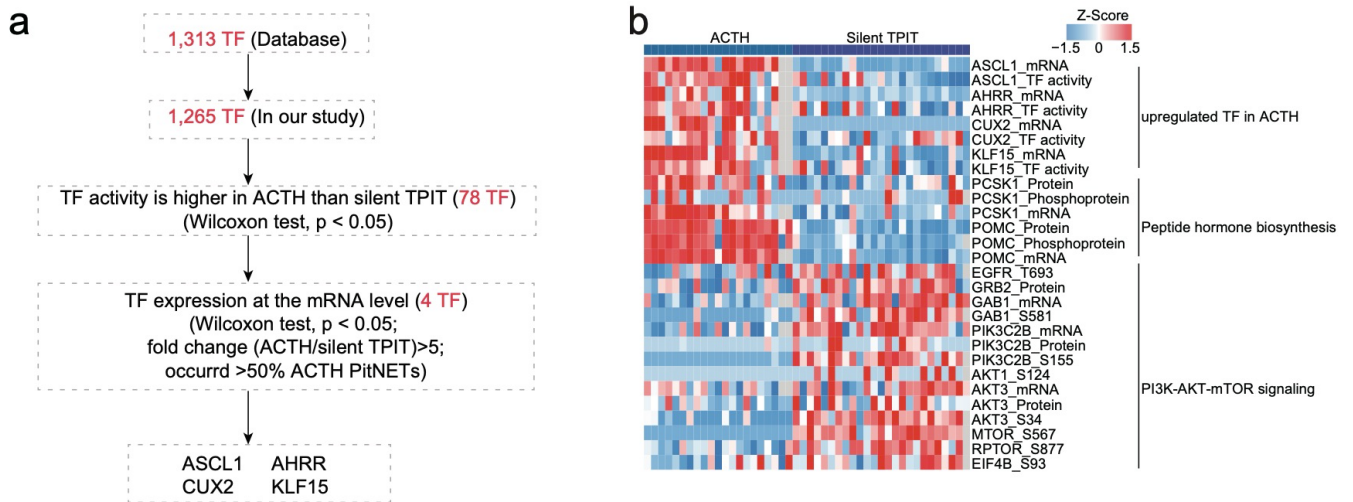

**Supplementary information, Fig. S6 Different TFs between ACTH and silent TPIT PitNETs.**

**a** Schematic of upregulated transcription factors screening in ACTH compared with silent TPIT PitNETs.

**b** Heatmap comparing multi-omics profiles of upregulated TFs, peptide hormone biosynthesis, and PI3K-AKT-mTOR signaling pathways between ACTH and silent TPIT PitNETs.
