# Supplementary material for: Integrated proteogenomic characterization across major histological types of pituitary neuroendocrine tumors
Source: PubMed Central journal article supplement (PMC9715725; doi:10.1038/s41422-022-00736-5), 2022-10-28
Supplement: 41422_2022_736_MOESM8_ESM.pdf [file 41422_2022_736_MOESM8_ESM.pdf]

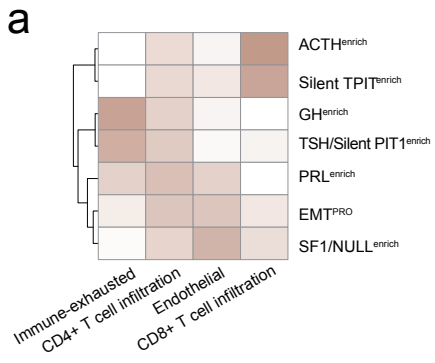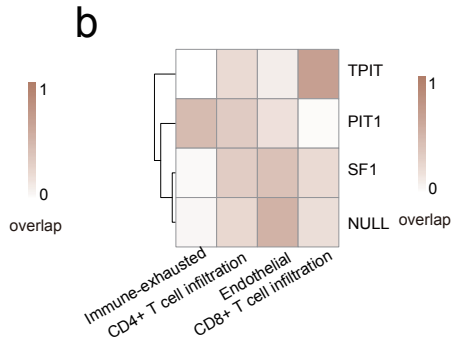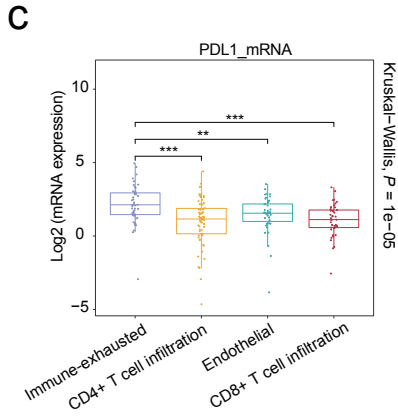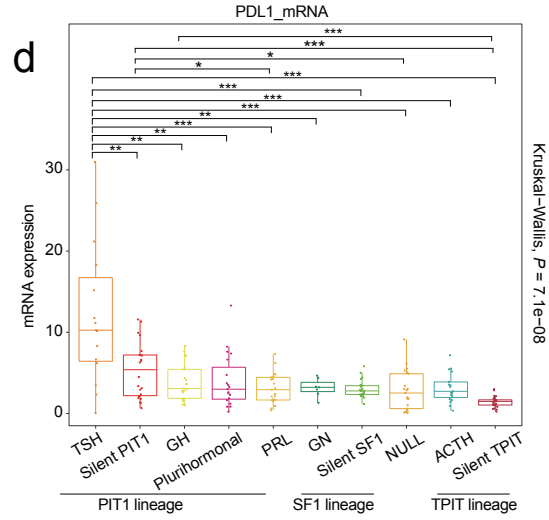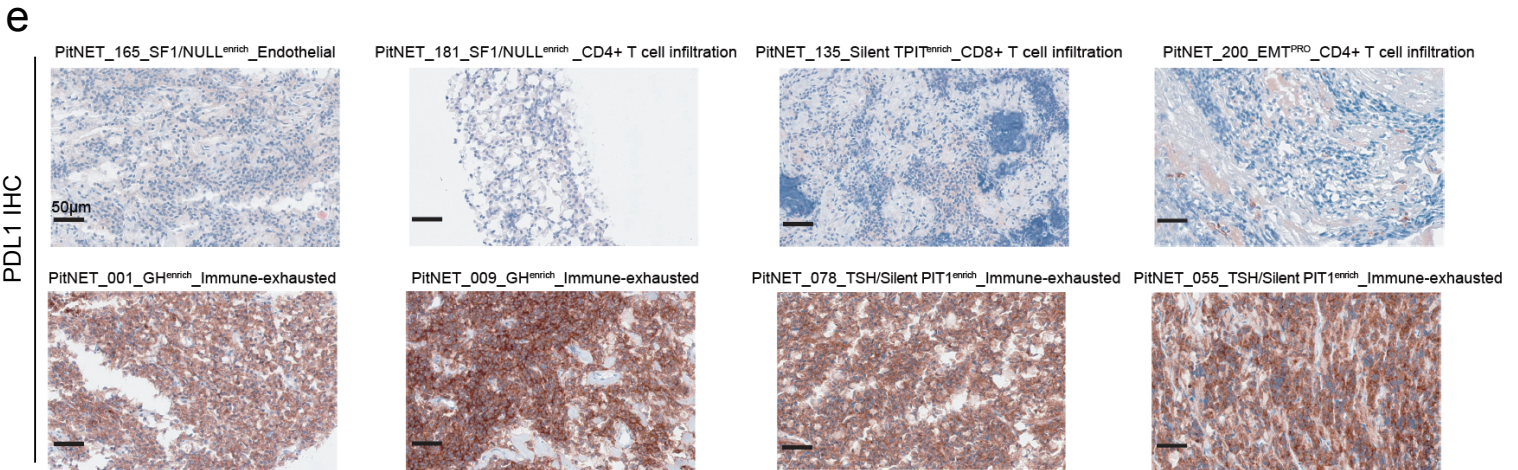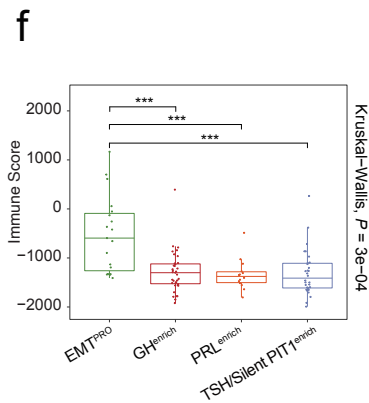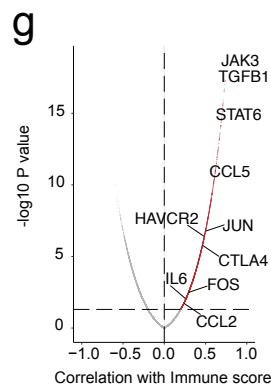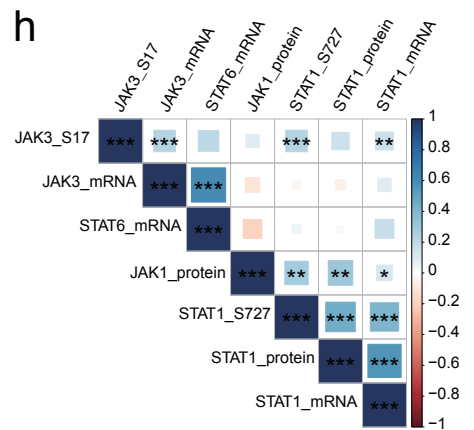

Spearman's correlation in 194 PitNETs

**Supplementary information, Fig. S8 Immune landscape in PitNETs, related to Fig. 5.**

- a** Heatmap showing the comparison between immune clusters (columns) with proteomic clusters (rows). Each row sums to one, with different entries showing the proportion of tumors allocated to different immune clusters.
- b** Heatmap showing the comparison between immune clusters (columns) with TF lineages (rows). Each row sums to one, with different entries showing the proportion of tumors allocated to different immune clusters.
- c** Boxplot showing the mRNA expression of *PDL1* among the four immune clusters. Kruskal-Wallis test was used to test if any of the differences among the subgroups were statistically significant. Wilcoxon rank-sum test was used to estimate the significance of two subgroups,  $**P < 0.01$ ,  $***P < 0.001$ .
- d** Boxplot showing the mRNA expression of *PDL1* among the ten clinicopathological subtypes. Kruskal-Wallis test was used to test if any of the differences among the subgroups were statistically significant. Wilcoxon rank-sum test was used to estimate the significance of two subgroups,  $**P < 0.01$ ,  $***P < 0.001$ .
- e** Representative graphs of *PDL1* staining in SF1/NULL<sup>enrich</sup>, silent TPIT<sup>enrich</sup>, EMT<sup>PRO</sup>, GH<sup>enrich</sup>, and TSH/silent PIT1<sup>enrich</sup> clusters. Scale bar is 50  $\mu\text{m}$ .
- f** Boxplot showing the immune score among four proteomic clusters within PIT1 lineage. Kruskal-Wallis test was used to test if any of the differences among the subgroups were statistically significant. Wilcoxon rank-sum test was used to estimate the significance of two subgroups,  $***P < 0.001$ .
- g** Volcano plot showing the Spearman's correlation ( $x$ -axis) versus  $P$  value ( $y$ -axis) between immune score and genes at the mRNA level.
- h** Spearman's correlation among JAK1, JAK3, STAT1 and STAT6 at the mRNA, protein and phosphorylation levels in 194 PitNETs ( $*P < 0.05$ ,  $**P < 0.01$ ,  $***P < 0.001$ ).
