# Supplementary material for: Integrated proteogenomic characterization across major histological types of pituitary neuroendocrine tumors
Source: PubMed Central journal article supplement (PMC9715725; doi:10.1038/s41422-022-00736-5), 2022-10-28
Supplement: 41422_2022_736_MOESM9_ESM.pdf [file 41422_2022_736_MOESM9_ESM.pdf]

**a**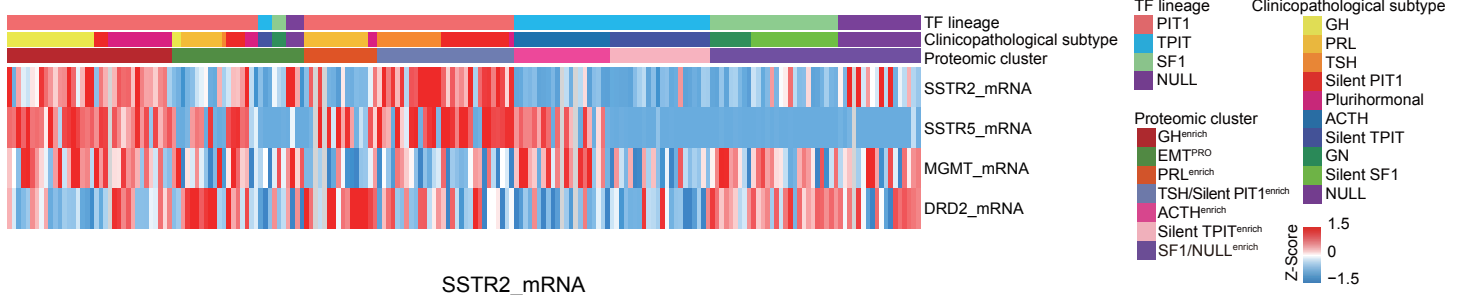**b**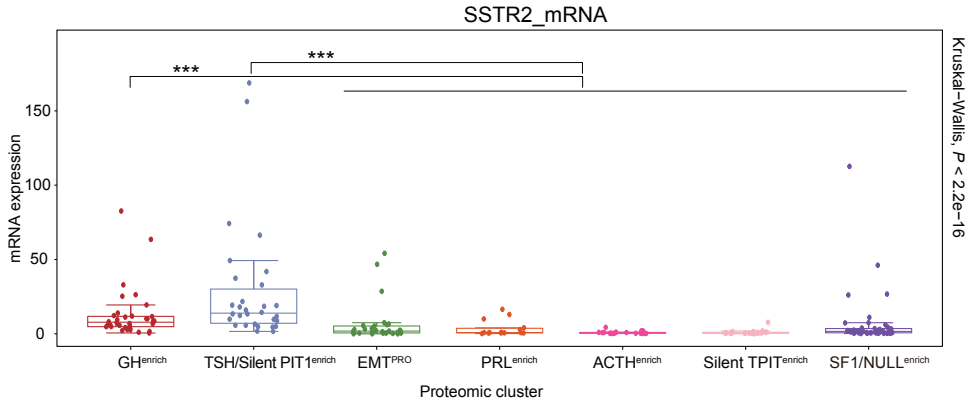**c**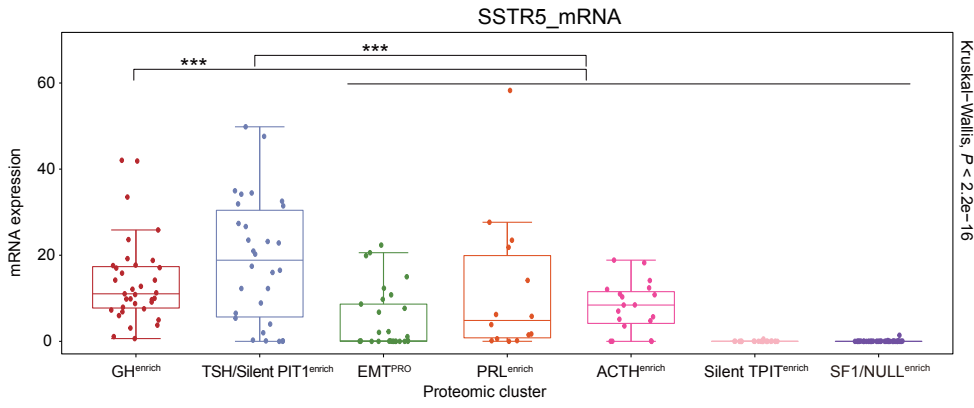**d**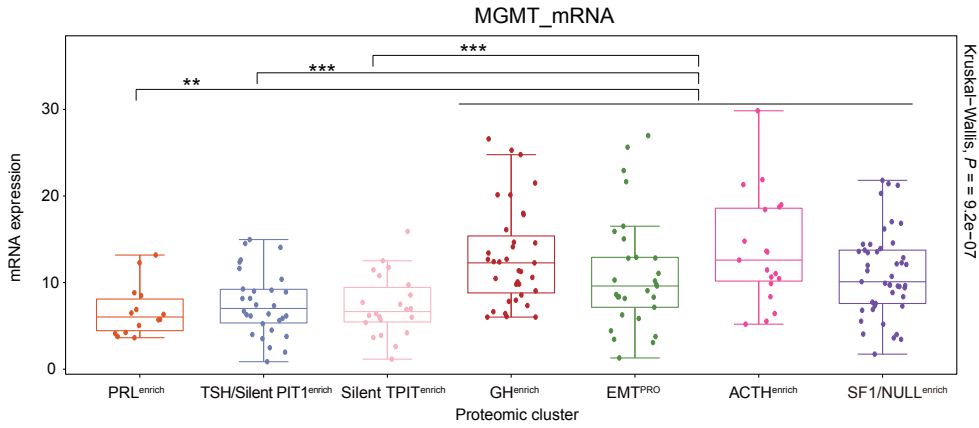**e**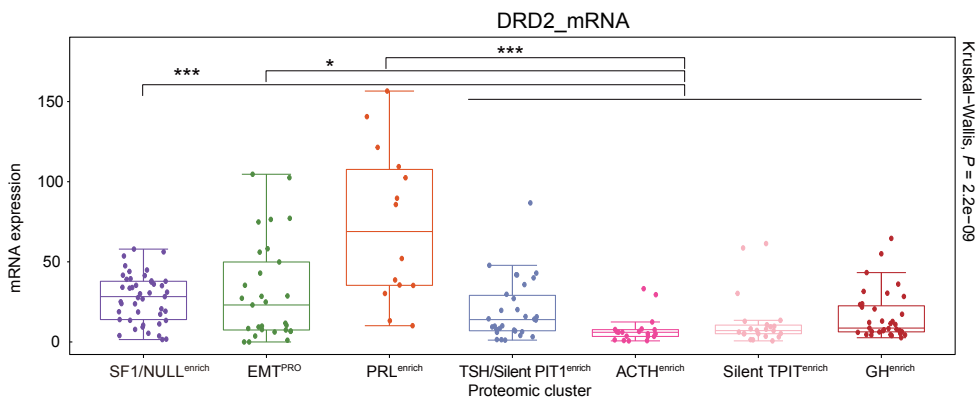

**Supplementary information, Fig. S9 The mRNA expression levels of targets of FDA-approved drugs in all 200 PitNETs, related to Fig. 6.**

**a** Heatmap comparing the mRNA expression of *SSTR2*, *SSTR5*, *MGMT* and *DRD2* among the seven proteomic clusters.

**b, c** Boxplot showing mRNA expression of *SSTR2* (**b**) and *SSTR5* (**c**) was significantly elevated in GH<sup>enrich</sup> and TSH/silent PIT1<sup>enrich</sup> than in other proteomic clusters (Wilcoxon rank-sum test, \*\*\* $P < 0.001$ ). Kruskal-Wallis test was used to test if any of the differences among the subgroups were statistically significant.

**d** Boxplot showing mRNA expression of *MGMT* was significantly lower in PRL<sup>enrich</sup>, TSH/silent PIT1<sup>enrich</sup>, and silent TPIT<sup>enrich</sup> than in other proteomic clusters, respectively (Wilcoxon rank-sum test, \*\* $P < 0.001$ , \*\*\* $P < 0.001$ ). Kruskal-Wallis test was used to test if any of the differences among the subgroups were statistically significant.

**e** Boxplot showing mRNA expression of *DRD2* was significantly elevated in SF1/NULL<sup>enrich</sup>, EMT<sup>PRO</sup>, and PRL<sup>enrich</sup> than in other proteomic clusters, respectively (Wilcoxon rank-sum test, \* $P < 0.05$ , \*\*\* $P < 0.001$ ). Kruskal-Wallis test was used to test if any of the differences among the subgroups were statistically significant.
